# Supplementary material for: Characterizations of cationic γ-carbolines binding with double-stranded DNA by spectroscopic methods and AFM imaging
Source: Royal Society of Chemistry journal article supplement (doi:10.1039/c4ob01905a), 2014-11-19
Supplement: c4ob01905a1.pdf [file c4ob01905a1.pdf]

## Supplementary Information

### Characterizations of cationic $\gamma$ -carboline binding with double-stranded DNA by spectroscopic methods and AFM imaging

Tao Jia <sup>a\*</sup>, Jing Wang <sup>b</sup>, Peng Guo <sup>a</sup>, Junping Yu <sup>b\*</sup>

[a] Dr. T. Jia, Prof. P. Guo School of Pharmaceutical Sciences, Wuhan University, Wuhan, Hubei 430072, PR

China Fax: +86-27-68759850, E-mail: [jjat@whu.edu.cn](mailto:jjat@whu.edu.cn) (Tao Jia)

[b] J. Wang, Dr. J. Yu Key Laboratory of Special Pathogens and Biosafety, Wuhan Institute of Virology, Chinese

Academy of Sciences, Wuhan, Hubei 430071, PR China Tel:+86-27-51861078, Email [yujp@wh.iov.cn](mailto:yujp@wh.iov.cn) (Junping

Yu)

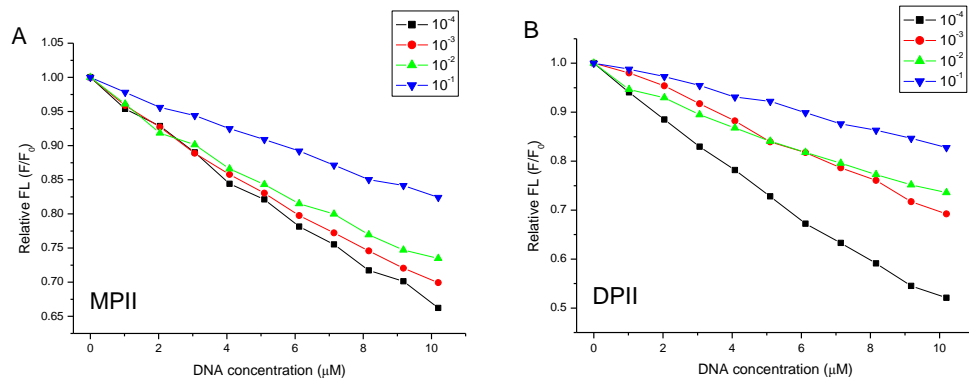

Fig. S1. Relative fluorescence intensity decreases with the titration of **MPII** and **DPII** (0.1 μM) by CT-DNA (0–10.2 μM). Black line and squares: an ionic strength of 10<sup>-4</sup> M; red line and diamonds: an ionic strength of 10<sup>-3</sup> M; green line and triangles: an ionic strength of 10<sup>-2</sup> M; blue line and inverted triangles: an ionic strength of 10<sup>-1</sup> M.

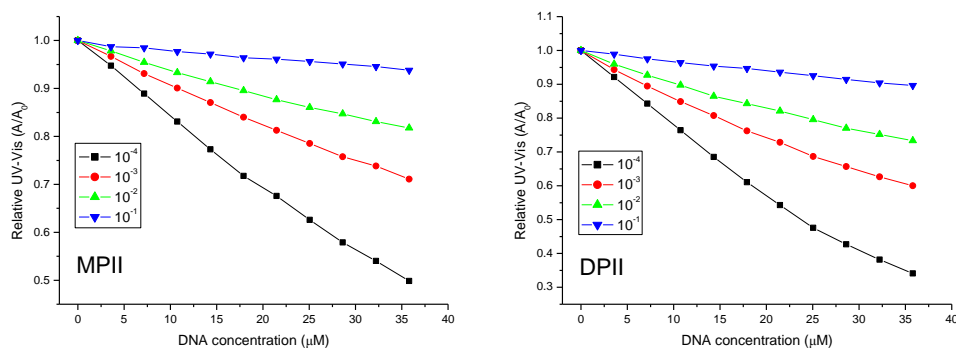

Fig. S2. Relative UV-Vis absorbance decreases with the titration of **MPII** ( $\lambda_{\max}=260$  nm) and **DPII** ( $\lambda_{\max}=262$  nm) (10 μM) by CT-DNA (0–35.8 μM). Black line and squares: an ionic strength of 10<sup>-4</sup> M; red line and diamonds: an ionic strength of 10<sup>-3</sup> M; green line and triangles: an ionic strength of 10<sup>-2</sup> M; blue line and inverted triangles: an ionic strength of 10<sup>-1</sup> M.

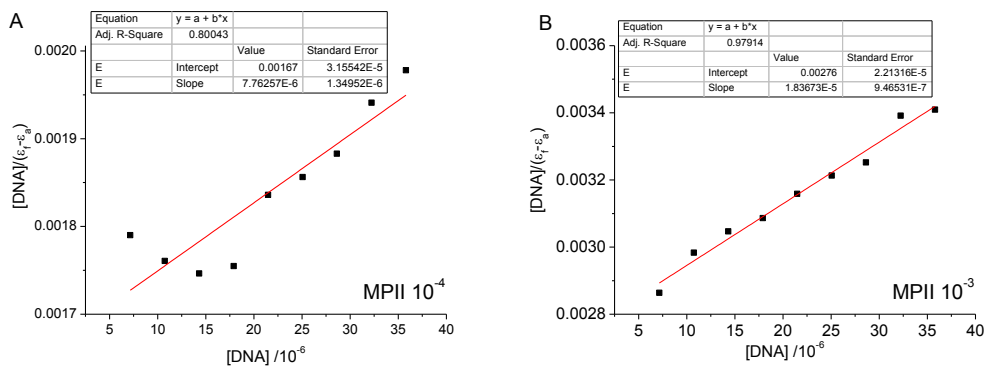

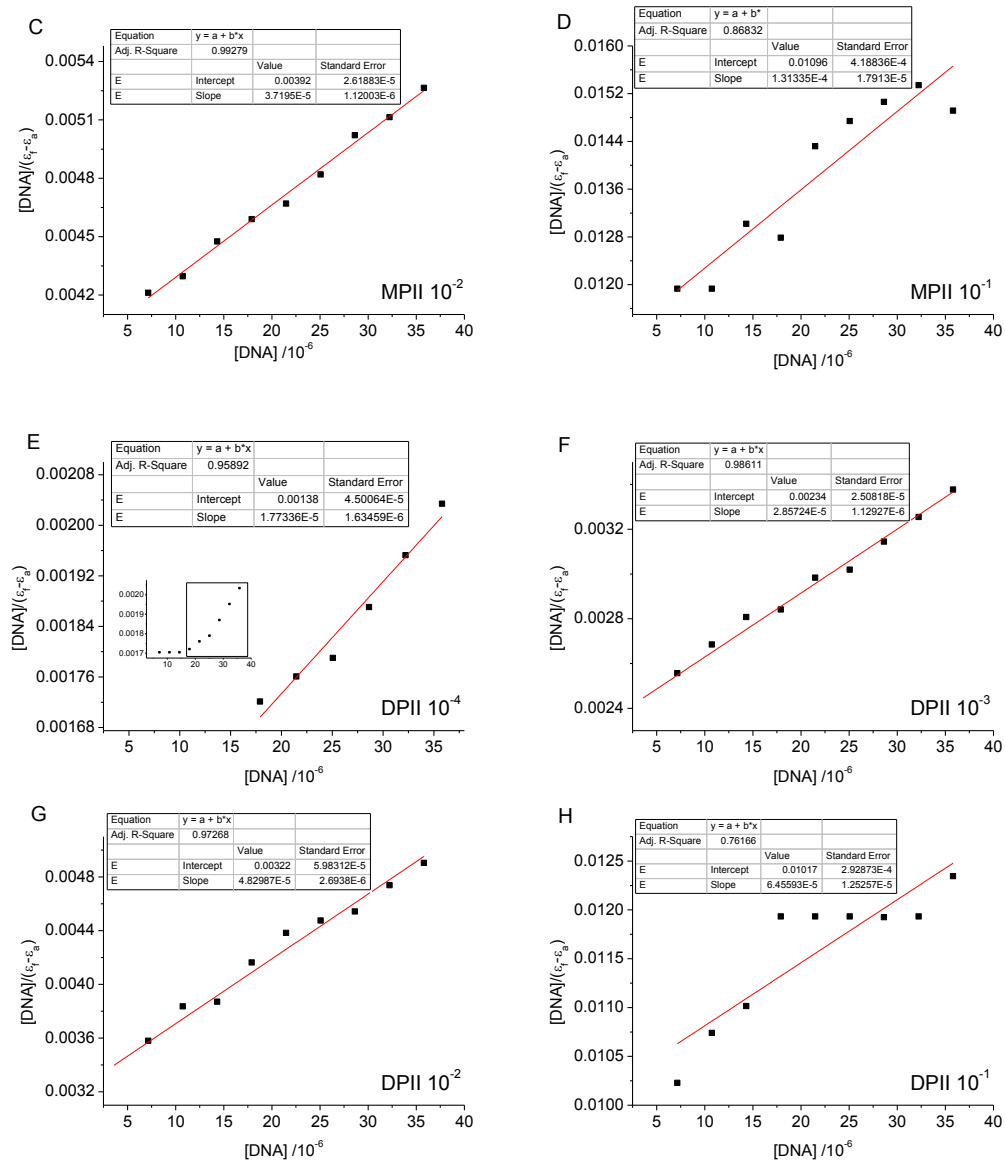

Fig. S3. The plots of  $[DNA]/(\epsilon_t - \epsilon_a)$  versus  $[DNA]$  for the titrations of DNA with **MPII** (A-D) and **DPII** (E-H) in various ionic strengths.

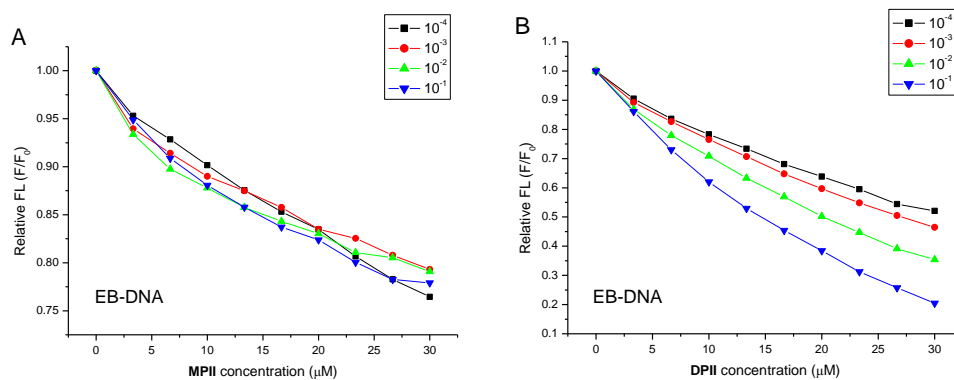

Fig. S4. Relative fluorescence intensity decreases with the titration of **EB-DNA** (2  $\mu\text{M}$  : 5  $\mu\text{M}$ ) by **MPII** (A) and **DPII** (B) (0–30  $\mu\text{M}$ ). Black line and squares: an ionic strength of  $10^{-4}$  M; red line and diamonds: an ionic strength

of  $10^{-3}$  M; green line and triangles: an ionic strength of  $10^{-2}$  M; blue line and inverted triangles: an ionic strength of  $10^{-1}$  M.

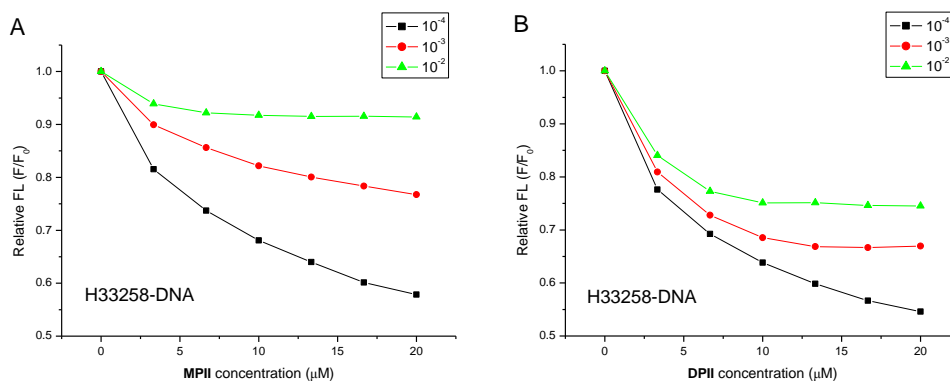

Fig. S5. Relative fluorescence intensity decreases with the titration of **H33258-DNA** ( $2 \mu\text{M} : 5 \mu\text{M}$ ) by **MPII** (A) and **DPII** (B) ( $0\text{--}20 \mu\text{M}$ ). Black line and squares: an ionic strength of  $10^{-4}$  M; red line and diamonds: an ionic strength of  $10^{-3}$  M; green line and triangles: an ionic strength of  $10^{-2}$  M.

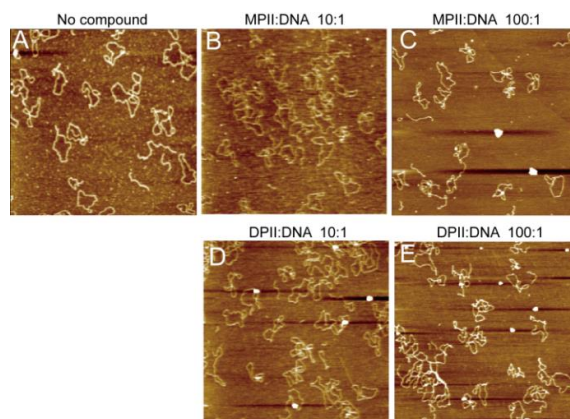

Fig. S6. AFM images for pBR322 with the increase of **MPII** and **DPII** at the mole ratio of compound:DNA=0:1 (A), 10:1 (B) and (D)), 100:1 ((C) and (E)). Scan area:  $3000 \text{ nm} \times 3000 \text{ nm}$ . Z range is 2 nm.

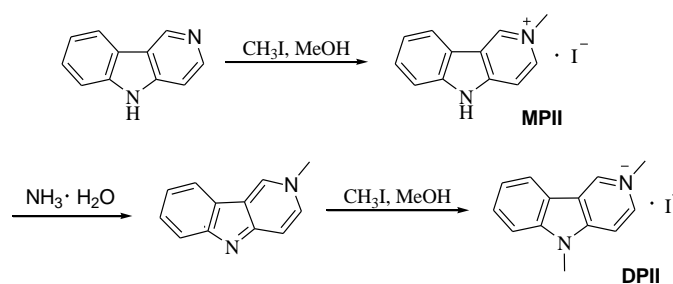

Fig.S7. Synthesis of the two cationic  $\gamma$ -carbolines

## Spectroscopic data about three synthetic compounds

### 1. 2-Methyl-5H-pyrido[4,3-b]indolium iodide (MPII) (Fig. S2-4)

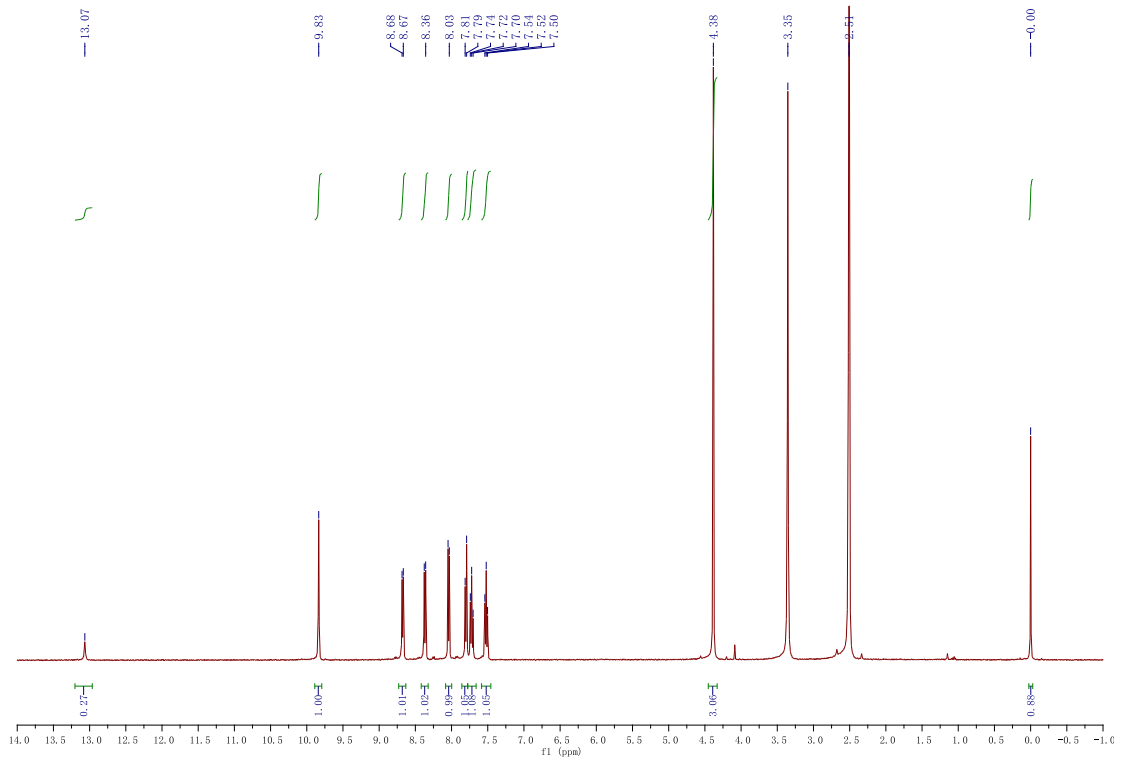

Fig. S8.  $^1\text{H}$  NMR of 2-methyl-5H-pyrido[4,3-b]indolium iodide (MPII)

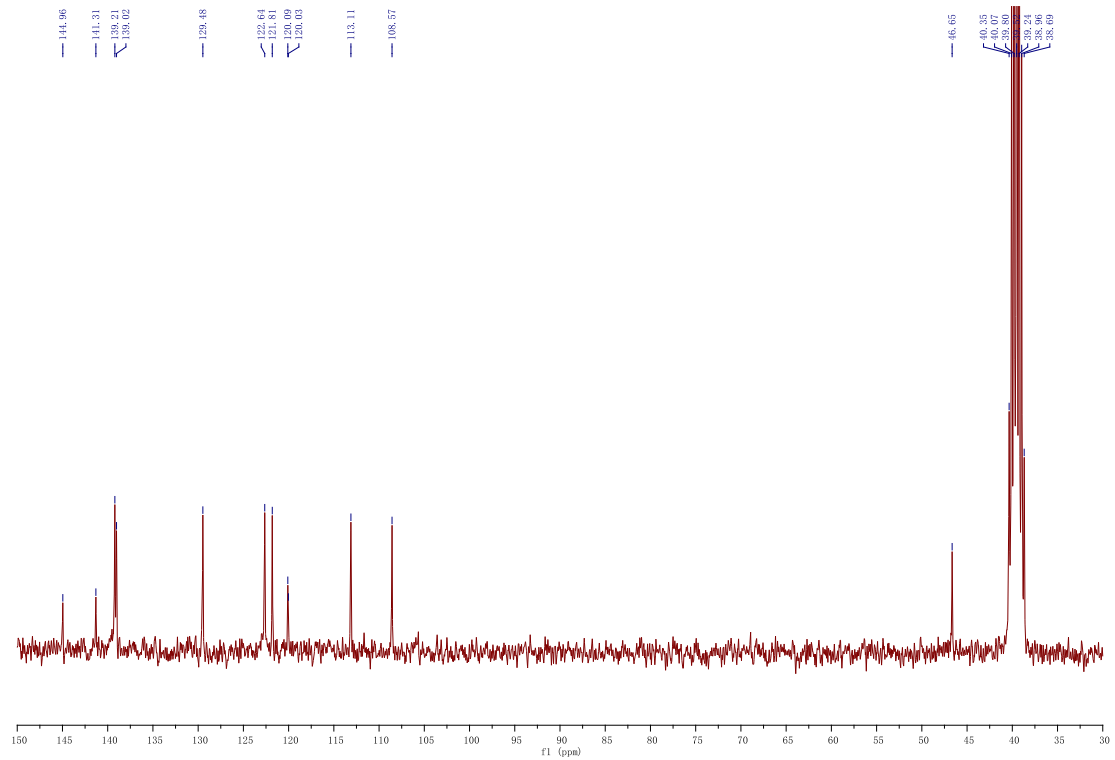

Fig. S9.  $^{13}\text{C}$  NMR of 2-methyl-5H-pyrido[4,3-b]indolium iodide (MPII)

**Acquisition Parameter**

|             |            |                      |          |                  |           |
|-------------|------------|----------------------|----------|------------------|-----------|
| Source Type | ESI        | Ion Polarity         | Positive | Set Nebulizer    | 0.3 Bar   |
| Focus       | Not active |                      |          | Set Dry Heater   | 180 °C    |
| Scan Begin  | 50 m/z     | Set Capillary        | 4500 V   | Set Dry Gas      | 4.0 l/min |
| Scan End    | 3000 m/z   | Set End Plate Offset | -500 V   | Set Divert Valve | Waste     |

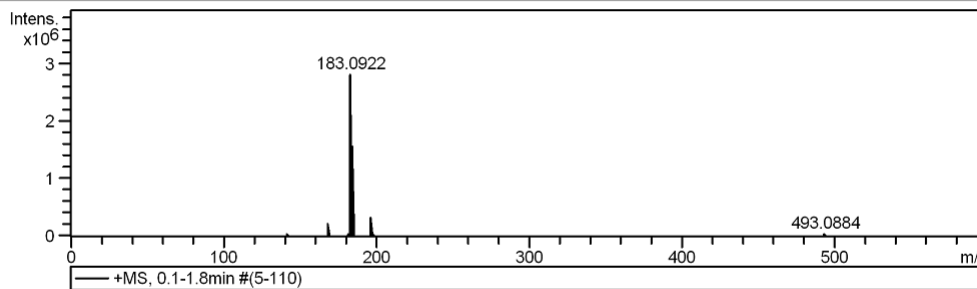

| # | m/z      | Res. | S/N     | I       | FWHM   |
|---|----------|------|---------|---------|--------|
| 1 | 168.0683 | 4485 | 6604.5  | 239251  | 0.0375 |
| 2 | 183.0922 | 2561 | 83228.4 | 2825307 | 0.0715 |
| 3 | 197.1076 | 4803 | 10415.4 | 331688  | 0.0410 |
| 4 | 493.0884 | 6173 | 7681.4  | 57840   | 0.0799 |

Fig. S10. HRMS of 2-methyl-5H-pyrido[4,3-b]indolium iodide (MPII)

2. 2-Methyl-2H-pyrido[4,3-b]indole (Fig. S5-7)

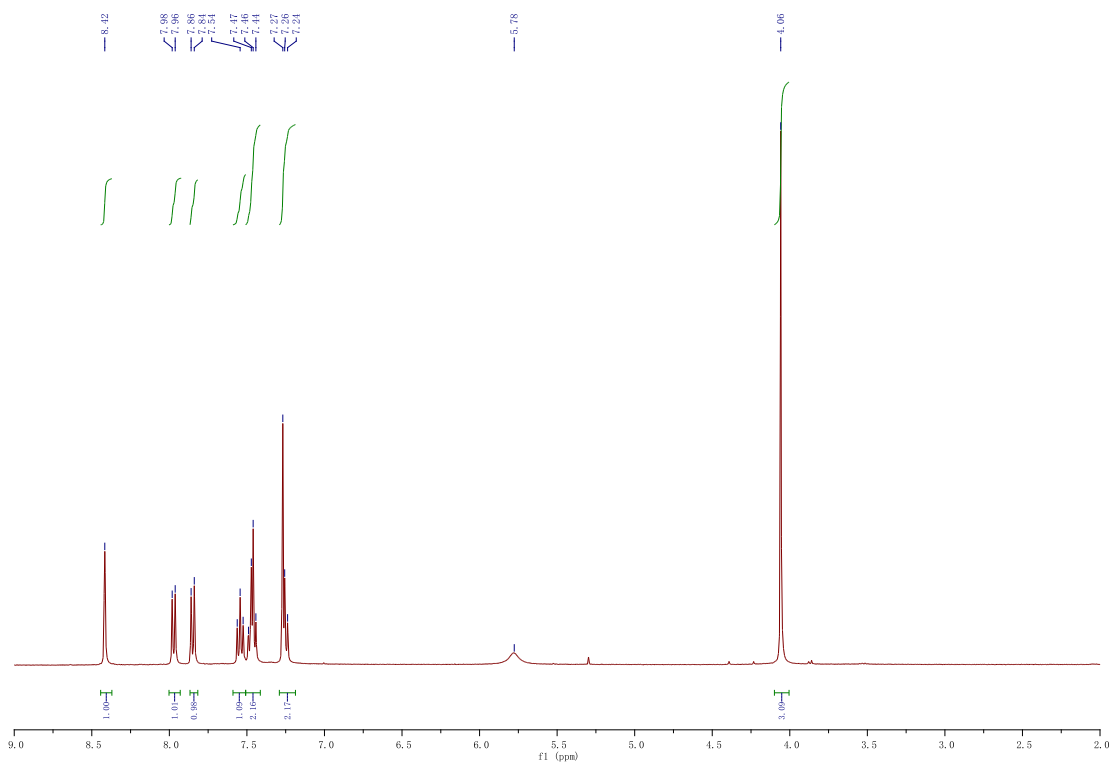

Fig. S11. <sup>1</sup>H NMR of 2-methyl-2H-pyrido[4,3-b]indole

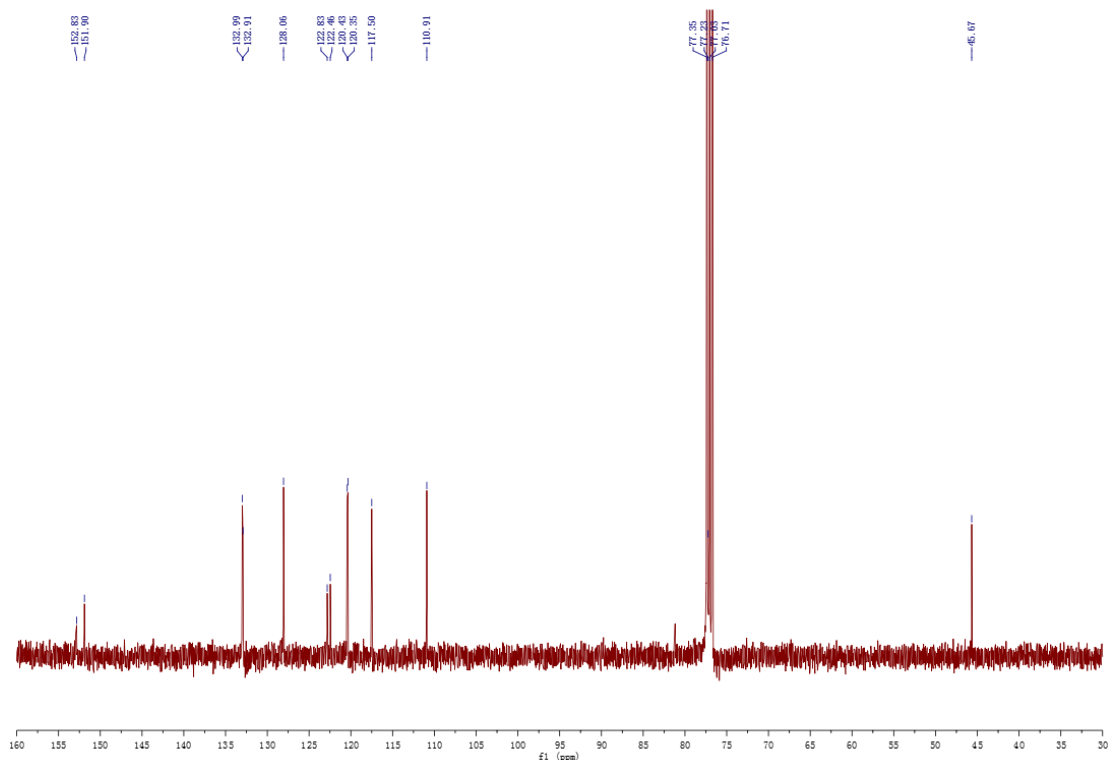

Fig. S12.  $^{13}\text{C}$  NMR of 2-methyl-2H-pyrido[4,3-b]indole

**Acquisition Parameter**

|             |            |                      |          |                  |           |
|-------------|------------|----------------------|----------|------------------|-----------|
| Source Type | ESI        | Ion Polarity         | Positive | Set Nebulizer    | 0.3 Bar   |
| Focus       | Not active |                      |          | Set Dry Heater   | 180 °C    |
| Scan Begin  | 50 m/z     | Set Capillary        | 4500 V   | Set Dry Gas      | 4.0 l/min |
| Scan End    | 3000 m/z   | Set End Plate Offset | -500 V   | Set Divert Valve | Waste     |

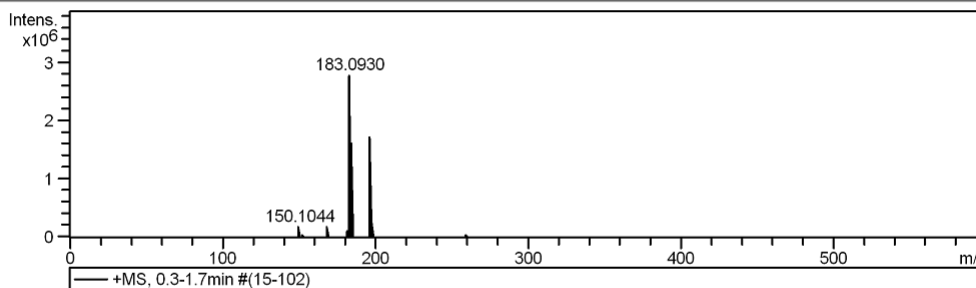

| # | m/z      | Res. | S/N     | I       | FWHM   |
|---|----------|------|---------|---------|--------|
| 1 | 150.1044 | 4455 | 3249.5  | 193296  | 0.0337 |
| 2 | 168.0682 | 4441 | 3365.8  | 186418  | 0.0378 |
| 3 | 183.0930 | 2454 | 53635.1 | 2789761 | 0.0746 |
| 4 | 197.1085 | 4228 | 35203.3 | 1720289 | 0.0466 |

Fig. S13. HRMS of 2-methyl-2H-pyrido[4,3-b]indole

- 2,5-Dimethyl-5H-pyrido[4,3-b]indolium iodide (DPII) (Fig. S8-10)

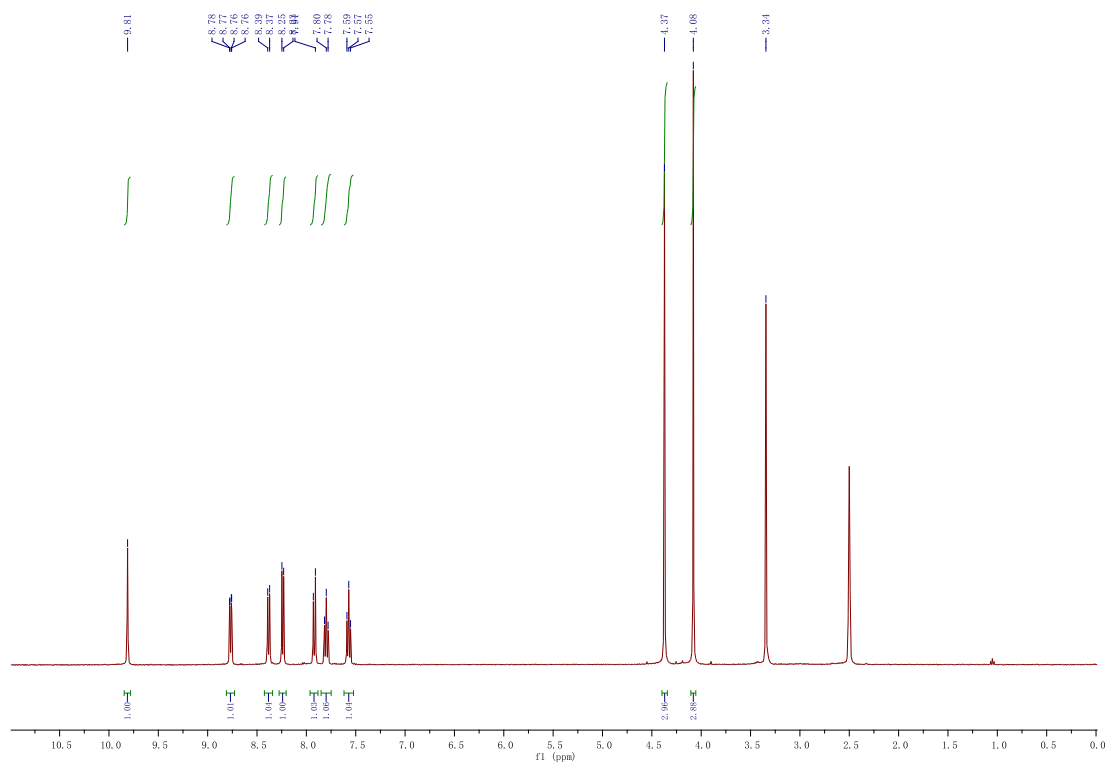

Fig. S14.  $^1\text{H}$  NMR of 2,5-dimethyl-5*H*-pyrido[4,3-*b*]indolium iodide (DPII)

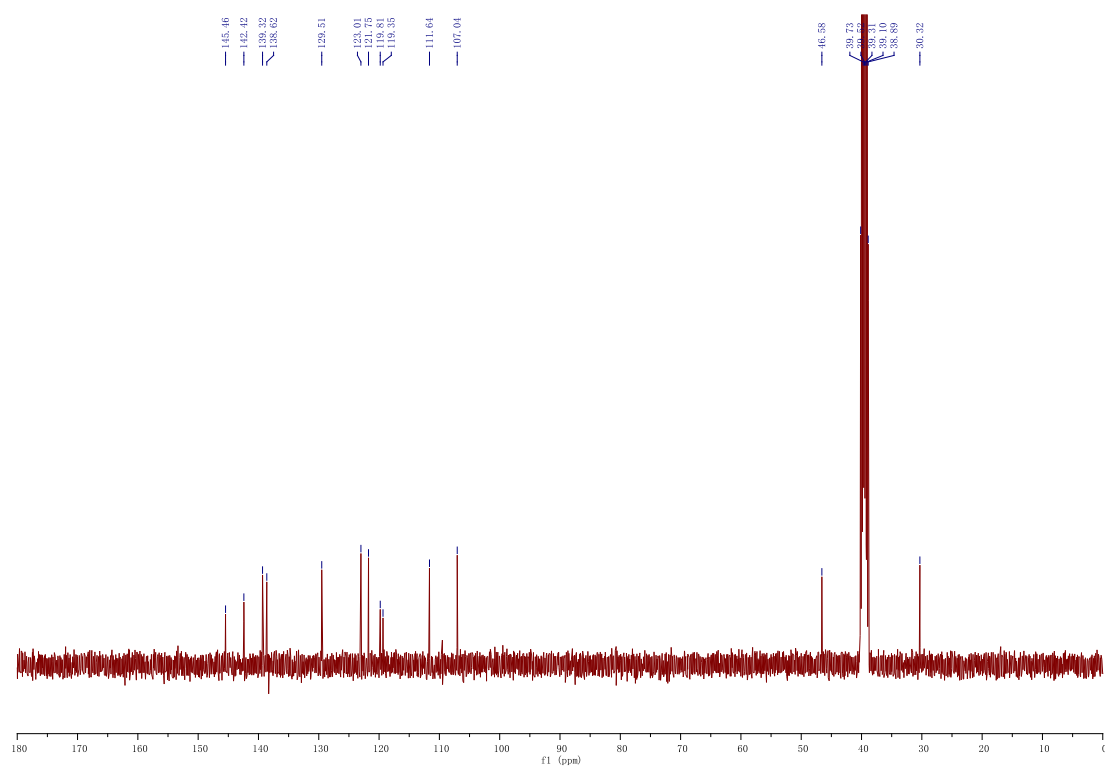

Fig. S15.  $^{13}\text{C}$  NMR of 2,5-dimethyl-5*H*-pyrido[4,3-*b*]indolium iodide (DPII)



**Acquisition Parameter**

|             |            |                      |          |                  |           |
|-------------|------------|----------------------|----------|------------------|-----------|
| Source Type | ESI        | Ion Polarity         | Positive | Set Nebulizer    | 0.3 Bar   |
| Focus       | Not active |                      |          | Set Dry Heater   | 180 °C    |
| Scan Begin  | 50 m/z     | Set Capillary        | 4500 V   | Set Dry Gas      | 4.0 l/min |
| Scan End    | 3000 m/z   | Set End Plate Offset | -500 V   | Set Divert Valve | Waste     |

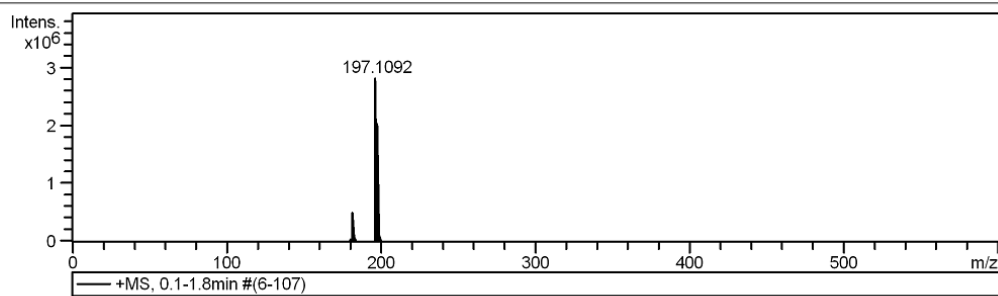

| # | m/z      | Res. | S/N     | I       | FWHM   |
|---|----------|------|---------|---------|--------|
| 1 | 182.0842 | 4554 | 14027.2 | 505927  | 0.0400 |
| 2 | 197.1092 | 2360 | 82799.8 | 2833069 | 0.0835 |
| 3 | 198.1118 | 4410 | 59670.8 | 2034387 | 0.0449 |
| 4 | 199.1126 | 5539 | 3577.4  | 121529  | 0.0359 |

Fig. S16. HRMS of 2,5-dimethyl-5H-pyrido[4,3-b]indolium iodide (DPII)
